# Supplementary material for: Solving the Puzzle of Metastasis: The Evolution of Cell Migration in Neoplasms
Source: PLoS One. 2011 Apr 27;6(4):e17933. doi: 10.1371/journal.pone.0017933 (PMC3083389; doi:10.1371/journal.pone.0017933)
Supplement: Table S1 — Parameters and their values used in the model. (PDF) [file pone.0017933.s008.pdf]

**Table S1.** Parameters and their values used in the model.

| Parameter                                                         | Meaning                                                                                                                   | Biological Value                                                                     | Normalized Value                                           | Reference       |
|-------------------------------------------------------------------|---------------------------------------------------------------------------------------------------------------------------|--------------------------------------------------------------------------------------|------------------------------------------------------------|-----------------|
| Neoplasm Size (P)                                                 | The dimensions (in patches) of the square grid representing the neoplasm.                                                 | 2mm×2mm                                                                              | 64×64 patches (~30 $\mu\text{m}$ ×30 $\mu\text{m}$ /patch) | (1)             |
| Neoplasm Cell Density ( $n_0$ )                                   | The cell density in the neoplasm.                                                                                         | $3.0 \times 10^3/\text{mm}^2$                                                        | 3 per patch                                                | (2)             |
| Initial Neoplasm Cell Number (C)                                  | The initial number of cells at the start of the model                                                                     | (derived from P and $n_0$ )                                                          | ~12,000 cells                                              | (1, 2)          |
| Vessel Number (V)                                                 | The total number of blood vessels.                                                                                        | 7.5 - 150/ $\text{mm}^2$                                                             | 30 – 600                                                   | (2)             |
| Oxygen Input Rate ( $r_i$ )                                       | The amount of oxygen input into the neoplasm each time step.                                                              | $2.7 \times 10^{-14} \text{ mol/ mm}^2/\text{s}$<br>(estimated based on $n_0, r_m$ ) | 60 units per patch per time step                           | Estimated       |
| Oxygen Diffusion Coefficient ( $d_c$ )                            | The percent of total oxygen in a patch distributed to its eight neighbor patches in each iteration of diffusion function. | $1.8 \times 10^{-5} \text{ cm}^2/\text{s}$                                           | 50% (Calibrated)                                           | (3)             |
| Oxygen update time ( $t_a$ )                                      | The number of time discretization per time step.                                                                          | N/A, for approximating continuous behavior                                           | 10 per time step                                           | Model specific  |
| Hypoxia Threshold ( $t_h$ )                                       | The amount of oxygen in a patch below which a cell signals for angiogenesis.                                              | 0.5 – 30% of the concentration in surrounding tissue                                 | 8 units                                                    | (4)             |
| Vessel Occlusion Threshold ( $t_o$ )                              | The number of cells in the same patch as the blood vessel that occludes the blood vessel.                                 | N/A, for achieving vessel turnover rate of 5 days                                    | 20 cells                                                   | Model specific  |
| Fixed Vessel Lifespan ( $t_f$ )                                   | The number of time steps that a blood vessel persists before it is removed from the model                                 | 48h – 250 days                                                                       | 4 – 500 time steps                                         | (5)             |
| Cell Oxygen Absorption Rate ( $r_a$ )                             | The maximum amount of oxygen one cell can absorb in a time step.                                                          | $4.5 \times 10^{-17} \text{ mol/cell/s}$<br>(exponential state of growth)            | 100 units                                                  | (6)             |
| Cell Metabolism Rate ( $r_m$ )                                    | The amount of resources that is metabolized in one cell per time step.                                                    | $8.9 \times 10^{-18} \text{ mol/cell/s}$<br>(plateau state of growth)                | 20 units                                                   | (6)             |
| Cell Reproduction Threshold ( $n_r$ )                             | The amount of resource units that must be accumulated before a cell can divide.                                           | N/A, for achieving tumor cell cycle of 1.5 day                                       | 240 units                                                  | (7)             |
| Initial Migration Propensity (p)                                  | The initial migration probability given to all cells at the start of the model.                                           | 5% of the cell population                                                            | 5%                                                         | (8)             |
| Initial Maximum Migration Distance (m)                            | The initial maximum distance that a cell can migrate given to all cells at the start of the model.                        | 3 $\mu\text{m}/\text{h}$                                                             | 1 patch per time step                                      | (9)             |
| Mutation Rate ( $\mu$ )                                           | The probability that a phenotype will change in a daughter cell when the parental cell divides                            | 0.01 per cell division                                                               | 0.01                                                       | (10)            |
| Migration Propensity Mutation Standard Deviation ( $sd_p$ )       | The standard deviation of the normal distribution from which the mutated migration propensity value is drawn.             | NA                                                                                   | (0.01,0.025,0.1)                                           | Parameter Sweep |
| Maximum Migration Distance Mutation Standard Deviation ( $sd_m$ ) | The standard deviation of the normal distribution from which the mutated maximum migration distance value is drawn.       | NA                                                                                   | (0.1,0.5,1)                                                | Parameter Sweep |

We adjusted the NetLogo diffusion coefficient and oxygen update time to mimic the oxygen gradient observed in normal tissues. Specifically, we modeled a slice of tissue of 8 by 8 patches with one microvessel in the center ( $\sim 120 \mu\text{m}$  radius). We turned off the cell death, reproduction and movement. Then we adjusted the oxygen update time and oxygen diffusion coefficient so that the oxygen gradient is similar to the observation in (11). This also agrees well with the fact the diffusion distance is between  $100 \mu\text{m}$  and  $200 \mu\text{m}$  (12).

#### Bibliography:

1. Basanta D, Strand DW, Lukner RB, et al. The role of transforming growth factor-beta-mediated tumor-stroma interactions in prostate cancer progression: an integrative approach. *Cancer Res* 2009; 69: 7111-20.
2. Okita Y, Kinoshita M, Goto T, et al. C-11-methionine uptake correlates with tumor cell density rather than with microvessel density in glioma: A stereotactic image-histology comparison. *Neuroimage* 2010; 49: 2977-82.
3. Grote J, Susskind R, Vaupel P. Oxygen Diffusivity in Tumor Tissue (Ds-Carcinosarcoma) under Temperature Conditions within Range of 20-40-Degrees-C. *Pflug Arch Eur J Phy* 1977; 372: 37-42.
4. Brown JM, William WR. Exploiting tumour hypoxia in cancer treatment. *Nat Rev Cancer* 2004; 4: 437-47.
5. Engerman RL, Pfaffenbach D, Davis MD. Cell turnover of capillaries. *Lab Invest* 1967; 17: 738-43.
6. Freyer JP, Tustanoff E, Franko AJ, Sutherland RM. In situ oxygen consumption rates of cells in V-79 multicellular spheroids during growth. *J Cell Physiol* 1984; 118: 53-61.
7. Butler LM, Agus DB, Scher HI, et al. Suberoylanilide hydroxamic acid, an inhibitor of histone deacetylase, suppresses the growth of prostate cancer cells in vitro and in vivo. *Cancer Res* 2000; 60: 5165-70.
8. Byers HR, Etoh T, Doherty JR, Sober AJ, Mihm MC, Jr. Cell migration and actin organization in cultured human primary, recurrent cutaneous and metastatic melanoma. Time-lapse and image analysis. *Am J Pathol* 1991; 139: 423-35.
9. Zaman MH, Trapani LM, Siemeski A, et al. Migration of tumor cells in 3D matrices is governed by matrix stiffness along with cell-matrix adhesion and proteolysis (vol 103, pg 10889, 2006). *P Natl Acad Sci USA* 2006; 103: 13897-.
10. Anderson ARA. A hybrid mathematical model of solid tumour invasion: the importance of cell adhesion. *Math Med Biol* 2005; 22: 163-86.
11. Tsai AG, Friesenecker B, Mazzoni MC, et al. Microvascular and tissue oxygen gradients in the rat mesentery. *P Natl Acad Sci USA* 1998; 95: 6590-5.
12. Olive PL, Vikse C, Trotter MJ. Measurement of oxygen diffusion distance in tumor cubes using a fluorescent hypoxia probe. *Int J Radiat Oncol Biol Phys* 1992; 22: 397-402.
